# Supplementary material
Source: PubMed Central journal article supplement (PMC2253983)
Supplement: mmc1.pdf [file mmc1.pdf]

## Supplemental Data

## A New Statistical Method for Predicting

## Classical HLA Alleles from SNP Data

Stephen Leslie, Peter Donnelly, and Gil McVean

Table S1. Performance of HLA-Allele Predictions in the Training Data for YRI at Two-Digit Resolution

| Allele       | No. Train | No. Test <sup>a</sup> | No. Call <sup>b</sup> | Correct | Sensitivity <sup>c</sup> | Specificity <sup>d</sup> |
|--------------|-----------|-----------------------|-----------------------|---------|--------------------------|--------------------------|
| <i>HLA-A</i> |           |                       |                       |         |                          |                          |
| 1            | 2         | 2                     | 0                     | 0       | NA                       | 0                        |
| 2            | 11        | 11                    | 11                    | 11      | 1                        | 1                        |
| 3            | 15        | 14                    | 14                    | 14      | 1                        | 1                        |
| 23           | 13        | 11                    | 11                    | 11      | 1                        | 1                        |
| 24           | 1         | 0                     | 0                     | NA      | NA                       | NA                       |
| 26           | 3         | 3                     | 3                     | 3       | 1                        | 1                        |
| 29           | 2         | 2                     | 2                     | 2       | 1                        | 1                        |
| 30           | 17        | 15                    | 15                    | 14      | 0.933333                 | 0.933333                 |
| 32           | 1         | 0                     | 0                     | NA      | NA                       | NA                       |
| 33           | 16        | 13                    | 13                    | 12      | 0.923077                 | 0.923077                 |
| 34           | 5         | 4                     | 4                     | 4       | 1                        | 1                        |
| 36           | 17        | 15                    | 17                    | 15      | 0.882353                 | 1                        |
| 66           | 2         | 2                     | 2                     | 2       | 1                        | 1                        |
| 68           | 9         | 9                     | 9                     | 9       | 1                        | 1                        |
| 74           | 5         | 4                     | 4                     | 4       | 1                        | 1                        |
| 80           | 1         | 0                     | 0                     | NA      | NA                       | NA                       |
| <i>HLA-C</i> |           |                       |                       |         |                          |                          |
| 1            | 1         | 0                     | 0                     | NA      | NA                       | NA                       |
| 2            | 11        | 10                    | 10                    | 10      | 1                        | 1                        |
| 3            | 5         | 5                     | 5                     | 5       | 1                        | 1                        |
| 4            | 30        | 26                    | 26                    | 26      | 1                        | 1                        |
| 5            | 1         | 0                     | 0                     | NA      | NA                       | NA                       |
| 6            | 1         | 0                     | 0                     | NA      | NA                       | NA                       |
| 7            | 23        | 22                    | 22                    | 22      | 1                        | 1                        |
| 8            | 12        | 11                    | 11                    | 11      | 1                        | 1                        |
| 12           | 1         | 0                     | 0                     | NA      | NA                       | NA                       |
| 14           | 1         | 0                     | 0                     | NA      | NA                       | NA                       |
| 15           | 2         | 2                     | 2                     | 2       | 1                        | 1                        |
| 16           | 20        | 16                    | 16                    | 15      | 0.9375                   | 0.9375                   |
| 17           | 10        | 8                     | 8                     | 7       | 0.875                    | 0.875                    |
| 18           | 2         | 1                     | 1                     | 1       | 1                        | 1                        |
| <i>HLA-B</i> |           |                       |                       |         |                          |                          |
| 7            | 9         | 9                     | 9                     | 9       | 1                        | 1                        |
| 8            | 1         | 0                     | 0                     | NA      | NA                       | NA                       |
| 13           | 3         | 3                     | 3                     | 3       | 1                        | 1                        |
| 14           | 3         | 3                     | 5                     | 3       | 0.6                      | 1                        |
| 15           | 18        | 17                    | 17                    | 17      | 1                        | 1                        |
| 18           | 6         | 6                     | 6                     | 6       | 1                        | 1                        |
| 35           | 10        | 8                     | 3                     | 3       | 1                        | 0.375                    |

|                        |    |    |    |    |          |          |
|------------------------|----|----|----|----|----------|----------|
| 39                     | 2  | 2  | 0  | 0  | NA       | 0        |
| 42                     | 10 | 8  | 8  | 8  | 1        | 1        |
| 44                     | 2  | 1  | 1  | 1  | 1        | 1        |
| 45                     | 2  | 2  | 2  | 2  | 1        | 1        |
| 49                     | 6  | 5  | 5  | 5  | 1        | 1        |
| 51                     | 5  | 4  | 1  | 0  | 0        | 0        |
| 52                     | 10 | 8  | 12 | 8  | 0.666667 | 1        |
| 53                     | 19 | 16 | 20 | 15 | 0.75     | 0.9375   |
| 56                     | 1  | 0  | 0  | NA | NA       | NA       |
| 57                     | 4  | 3  | 3  | 3  | 1        | 1        |
| 58                     | 7  | 7  | 7  | 7  | 1        | 1        |
| 78                     | 1  | 0  | 0  | NA | NA       | NA       |
| 81                     | 1  | 0  | 0  | NA | NA       | NA       |
| <b><i>HLA-DRB1</i></b> |    |    |    |    |          |          |
| 1                      | 6  | 6  | 6  | 6  | 1        | 1        |
| 3                      | 22 | 19 | 20 | 19 | 0.95     | 1        |
| 4                      | 1  | 0  | 0  | NA | NA       | NA       |
| 7                      | 15 | 11 | 11 | 11 | 1        | 1        |
| 8                      | 9  | 9  | 10 | 8  | 0.8      | 0.888889 |
| 9                      | 3  | 2  | 2  | 2  | 1        | 1        |
| 11                     | 19 | 15 | 14 | 14 | 1        | 0.933333 |
| 12                     | 2  | 2  | 1  | 1  | 1        | 0.5      |
| 13                     | 28 | 27 | 28 | 25 | 0.892857 | 0.925926 |
| 14                     | 3  | 3  | 2  | 2  | 1        | 0.666667 |
| 15                     | 12 | 10 | 10 | 10 | 1        | 1        |
| <b><i>HLA-DQA1</i></b> |    |    |    |    |          |          |
| 1                      | 51 | 44 | 44 | 42 | 0.954545 | 0.954545 |
| 2                      | 18 | 17 | 17 | 17 | 1        | 1        |
| 3                      | 7  | 5  | 5  | 5  | 1        | 1        |
| 4                      | 16 | 16 | 16 | 16 | 1        | 1        |
| 5                      | 28 | 26 | 26 | 24 | 0.923077 | 0.923077 |
| <b><i>HLA-DQB1</i></b> |    |    |    |    |          |          |
| 2                      | 33 | 30 | 30 | 30 | 1        | 1        |
| 3                      | 23 | 20 | 20 | 20 | 1        | 1        |
| 4                      | 13 | 13 | 13 | 13 | 1        | 1        |
| 5                      | 25 | 20 | 20 | 20 | 1        | 1        |
| 6                      | 26 | 23 | 23 | 23 | 1        | 1        |

<sup>a</sup>The numbers in the training and testing sets can differ because (1) alleles that had been imputed were included in the training, but not testing sets, and (2) singleton alleles were excluded.

<sup>b</sup>The number of times a given allele was predicted.

<sup>c</sup>Sensitivity represents the number correct divided by the number of calls. Note that calls are reported for a call threshold of 0.

<sup>d</sup>Specificity represents the number correct divided by the number of tests.

Table S2. Performance of HLA-Allele Predictions in the Training Data for CEU at Two-Digit Resolution

| Allele              | No. Train | No. Test <sup>a</sup> | No. Call <sup>b</sup> | Correct | Sensitivity <sup>c</sup> | Specificity <sup>d</sup> |
|---------------------|-----------|-----------------------|-----------------------|---------|--------------------------|--------------------------|
| <b><i>HLA-A</i></b> |           |                       |                       |         |                          |                          |
| 1                   | 36        | 34                    | 32                    | 32      | 1                        | 0.941176                 |
| 2                   | 66        | 63                    | 61                    | 61      | 1                        | 0.968254                 |
| 3                   | 17        | 16                    | 18                    | 16      | 0.888889                 | 1                        |

**American Journal of Human Genetics, Volume 82**

|                             |    |    |    |    |          |          |
|-----------------------------|----|----|----|----|----------|----------|
| 11                          | 7  | 7  | 7  | 7  | 1        | 1        |
| 23                          | 3  | 3  | 3  | 3  | 1        | 1        |
| 24                          | 17 | 13 | 13 | 13 | 1        | 1        |
| 25                          | 7  | 6  | 8  | 6  | 0.75     | 1        |
| 26                          | 4  | 4  | 2  | 2  | 1        | 0.5      |
| 29                          | 4  | 4  | 4  | 4  | 1        | 1        |
| 30                          | 2  | 2  | 2  | 2  | 1        | 1        |
| 31                          | 6  | 6  | 6  | 6  | 1        | 1        |
| 32                          | 5  | 5  | 5  | 5  | 1        | 1        |
| 68                          | 6  | 5  | 7  | 5  | 0.714286 | 1        |
| <hr/> <i>HLA-C</i> <hr/>    |    |    |    |    |          |          |
| 1                           | 3  | 3  | 3  | 3  | 1        | 1        |
| 2                           | 4  | 4  | 4  | 4  | 1        | 1        |
| 3                           | 19 | 19 | 19 | 19 | 1        | 1        |
| 4                           | 15 | 12 | 12 | 12 | 1        | 1        |
| 5                           | 21 | 20 | 21 | 20 | 0.952381 | 1        |
| 6                           | 21 | 17 | 17 | 17 | 1        | 1        |
| 7                           | 74 | 68 | 68 | 68 | 1        | 1        |
| 8                           | 3  | 2  | 2  | 2  | 1        | 1        |
| 12                          | 5  | 5  | 5  | 5  | 1        | 1        |
| 14                          | 3  | 1  | 1  | 1  | 1        | 1        |
| 15                          | 5  | 5  | 5  | 5  | 1        | 1        |
| 16                          | 6  | 6  | 5  | 5  | 1        | 0.833333 |
| 17                          | 1  | 0  | 0  | NA | NA       | NA       |
| <hr/> <i>HLA-B</i> <hr/>    |    |    |    |    |          |          |
| 7                           | 33 | 27 | 28 | 27 | 0.964286 | 1        |
| 8                           | 25 | 23 | 22 | 21 | 0.954545 | 0.913043 |
| 13                          | 3  | 3  | 3  | 3  | 1        | 1        |
| 14                          | 4  | 3  | 3  | 3  | 1        | 1        |
| 15                          | 15 | 14 | 14 | 14 | 1        | 1        |
| 18                          | 7  | 6  | 7  | 6  | 0.857143 | 1        |
| 27                          | 3  | 3  | 3  | 3  | 1        | 1        |
| 35                          | 12 | 9  | 9  | 9  | 1        | 1        |
| 37                          | 2  | 2  | 2  | 2  | 1        | 1        |
| 38                          | 1  | 0  | 0  | NA | NA       | NA       |
| 39                          | 3  | 3  | 3  | 3  | 1        | 1        |
| 40                          | 10 | 10 | 10 | 10 | 1        | 1        |
| 41                          | 1  | 0  | 0  | NA | NA       | NA       |
| 44                          | 29 | 28 | 28 | 28 | 1        | 1        |
| 49                          | 2  | 2  | 2  | 2  | 1        | 1        |
| 50                          | 3  | 3  | 3  | 3  | 1        | 1        |
| 51                          | 8  | 6  | 6  | 6  | 1        | 1        |
| 52                          | 3  | 3  | 2  | 2  | 1        | 0.666667 |
| 55                          | 2  | 2  | 0  | 0  | NA       | 0        |
| 56                          | 2  | 2  | 4  | 2  | 0.5      | 1        |
| 57                          | 11 | 10 | 10 | 10 | 1        | 1        |
| 58                          | 1  | 0  | 0  | NA | NA       | NA       |
| <hr/> <i>HLA-DRB1</i> <hr/> |    |    |    |    |          |          |
| 1                           | 16 | 13 | 13 | 13 | 1        | 1        |
| 3                           | 17 | 15 | 13 | 13 | 1        | 0.866667 |
| 4                           | 42 | 39 | 39 | 39 | 1        | 1        |
| 7                           | 23 | 21 | 21 | 21 | 1        | 1        |
| 8                           | 6  | 4  | 6  | 4  | 0.666667 | 1        |
| 10                          | 1  | 0  | 0  | NA | NA       | NA       |

|                 |    |    |    |    |          |          |
|-----------------|----|----|----|----|----------|----------|
| 11              | 12 | 12 | 12 | 12 | 1        | 1        |
| 12              | 1  | 0  | 0  | NA | NA       | NA       |
| 13              | 14 | 12 | 12 | 10 | 0.833333 | 0.833333 |
| 14              | 7  | 6  | 6  | 6  | 1        | 1        |
| 15              | 37 | 33 | 33 | 32 | 0.969697 | 0.969697 |
| 16              | 4  | 3  | 3  | 3  | 1        | 1        |
| <hr/>           |    |    |    |    |          |          |
| <i>HLA-DQA1</i> |    |    |    |    |          |          |
| 1               | 77 | 75 | 76 | 75 | 0.986842 | 1        |
| 2               | 24 | 23 | 23 | 23 | 1        | 1        |
| 3               | 41 | 41 | 41 | 41 | 1        | 1        |
| 4               | 6  | 4  | 4  | 4  | 1        | 1        |
| 5               | 32 | 31 | 30 | 30 | 1        | 0.967742 |
| <hr/>           |    |    |    |    |          |          |
| <i>HLA-DQB1</i> |    |    |    |    |          |          |
| 2               | 28 | 27 | 26 | 26 | 1        | 0.962963 |
| 3               | 68 | 68 | 68 | 68 | 1        | 1        |
| 4               | 6  | 4  | 4  | 4  | 1        | 1        |
| 5               | 28 | 26 | 26 | 26 | 1        | 1        |
| 6               | 50 | 49 | 50 | 49 | 0.98     | 1        |

<sup>a</sup>The numbers in the training and testing sets can differ because (1) alleles that had been imputed were included in the training, but not testing sets and (2) singleton alleles were excluded.

<sup>b</sup>The number of times a given allele was predicted.

<sup>c</sup>Sensitivity represents the number correct divided by the number of calls. Note that calls are reported for a call threshold of 0.

<sup>d</sup>Specificity represents the number correct divided by the number of tests.

Table S3. Performance of HLA-Allele Predictions in the Training Data for YRI at Four-Digit Resolution

| Allele       | No. Train | No. Test <sup>a</sup> | No. Call <sup>b</sup> | Correct | Sensitivity <sup>c</sup> | Specificity <sup>d</sup> |
|--------------|-----------|-----------------------|-----------------------|---------|--------------------------|--------------------------|
| <hr/>        |           |                       |                       |         |                          |                          |
| <i>HLA-A</i> |           |                       |                       |         |                          |                          |
| 101          | 2         | 2                     | 0                     | 0       | NA                       | 0                        |
| 201          | 5         | 5                     | 5                     | 5       | 1                        | 1                        |
| 202          | 3         | 3                     | 3                     | 3       | 1                        | 1                        |
| 205          | 2         | 2                     | 2                     | 2       | 1                        | 1                        |
| 211          | 1         | 0                     | 0                     | NA      | NA                       | NA                       |
| 301          | 15        | 14                    | 14                    | 14      | 1                        | 1                        |
| 2301         | 13        | 11                    | 11                    | 11      | 1                        | 1                        |
| 2424         | 1         | 0                     | 0                     | NA      | NA                       | NA                       |
| 2601         | 3         | 3                     | 3                     | 3       | 1                        | 1                        |
| 2902         | 2         | 2                     | 2                     | 2       | 1                        | 1                        |
| 3001         | 11        | 9                     | 9                     | 8       | 0.888889                 | 0.888889                 |
| 3002         | 6         | 6                     | 6                     | 6       | 1                        | 1                        |
| 3201         | 1         | 0                     | 0                     | NA      | NA                       | NA                       |
| 3301         | 3         | 3                     | 3                     | 3       | 1                        | 1                        |
| 3303         | 13        | 10                    | 10                    | 9       | 0.9                      | 0.9                      |
| 3402         | 5         | 4                     | 4                     | 4       | 1                        | 1                        |
| 3601         | 17        | 15                    | 17                    | 15      | 0.882353                 | 1                        |
| 6602         | 2         | 2                     | 2                     | 2       | 1                        | 1                        |
| 6801         | 2         | 2                     | 2                     | 2       | 1                        | 1                        |
| 6802         | 7         | 7                     | 7                     | 7       | 1                        | 1                        |
| 7401         | 5         | 4                     | 4                     | 4       | 1                        | 1                        |
| 8001         | 1         | 0                     | 0                     | NA      | NA                       | NA                       |

**American Journal of Human Genetics, Volume 82**

| <i>HLA-C</i>    |    |    |    |    |          |          |
|-----------------|----|----|----|----|----------|----------|
| 102             | 1  | 0  | 0  | NA | NA       | NA       |
| 202             | 11 | 10 | 10 | 10 | 1        | 1        |
| 302             | 5  | 5  | 5  | 5  | 1        | 1        |
| 401             | 30 | 26 | 26 | 26 | 1        | 1        |
| 501             | 1  | 0  | 0  | NA | NA       | NA       |
| 602             | 1  | 0  | 0  | NA | NA       | NA       |
| 701             | 16 | 15 | 15 | 15 | 1        | 1        |
| 702             | 7  | 7  | 7  | 7  | 1        | 1        |
| 802             | 6  | 5  | 4  | 4  | 1        | 0.8      |
| 804             | 6  | 6  | 7  | 6  | 0.857143 | 1        |
| 1203            | 1  | 0  | 0  | NA | NA       | NA       |
| 1402            | 1  | 0  | 0  | NA | NA       | NA       |
| 1505            | 2  | 2  | 2  | 2  | 1        | 1        |
| 1601            | 20 | 16 | 16 | 15 | 0.9375   | 0.9375   |
| 1701            | 10 | 8  | 8  | 7  | 0.875    | 0.875    |
| 1801            | 2  | 1  | 1  | 1  | 1        | 1        |
| <i>HLA-B</i>    |    |    |    |    |          |          |
| 702             | 9  | 9  | 9  | 9  | 1        | 1        |
| 801             | 1  | 0  | 0  | NA | NA       | NA       |
| 1302            | 3  | 3  | 3  | 3  | 1        | 1        |
| 1401            | 1  | 0  | 0  | NA | NA       | NA       |
| 1402            | 1  | 0  | 0  | NA | NA       | NA       |
| 1403            | 1  | 0  | 0  | NA | NA       | NA       |
| 1503            | 7  | 6  | 6  | 6  | 1        | 1        |
| 1510            | 10 | 10 | 10 | 10 | 1        | 1        |
| 1516            | 1  | 0  | 0  | NA | NA       | NA       |
| 1801            | 6  | 6  | 6  | 6  | 1        | 1        |
| 3501            | 10 | 8  | 3  | 3  | 1        | 0.375    |
| 3903            | 1  | 0  | 0  | NA | NA       | NA       |
| 3910            | 1  | 0  | 0  | NA | NA       | NA       |
| 4201            | 9  | 7  | 7  | 7  | 1        | 1        |
| 4202            | 1  | 0  | 0  | NA | NA       | NA       |
| 4403            | 2  | 1  | 1  | 1  | 1        | 1        |
| 4501            | 2  | 2  | 2  | 2  | 1        | 1        |
| 4901            | 6  | 5  | 5  | 5  | 1        | 1        |
| 5101            | 5  | 4  | 1  | 1  | 1        | 0.25     |
| 5201            | 10 | 8  | 11 | 8  | 0.727273 | 1        |
| 5301            | 19 | 16 | 21 | 16 | 0.761905 | 1        |
| 5601            | 1  | 0  | 0  | NA | NA       | NA       |
| 5702            | 1  | 0  | 0  | NA | NA       | NA       |
| 5703            | 3  | 2  | 2  | 2  | 1        | 1        |
| 5801            | 7  | 7  | 7  | 7  | 1        | 1        |
| 7801            | 1  | 0  | 0  | NA | NA       | NA       |
| 8101            | 1  | 0  | 0  | NA | NA       | NA       |
| <i>HLA-DRBI</i> |    |    |    |    |          |          |
| 101             | 2  | 2  | 3  | 2  | 0.666667 | 1        |
| 102             | 4  | 4  | 4  | 4  | 1        | 1        |
| 301             | 11 | 9  | 10 | 9  | 0.9      | 1        |
| 302             | 11 | 10 | 11 | 10 | 0.909091 | 1        |
| 403             | 1  | 0  | 0  | NA | NA       | NA       |
| 701             | 15 | 11 | 11 | 11 | 1        | 1        |
| 804             | 9  | 9  | 10 | 8  | 0.8      | 0.888889 |
| 901             | 3  | 2  | 2  | 2  | 1        | 1        |

**American Journal of Human Genetics, Volume 82**

|      |    |    |    |    |          |          |
|------|----|----|----|----|----------|----------|
| 1101 | 7  | 6  | 5  | 5  | 1        | 0.833333 |
| 1102 | 3  | 3  | 3  | 3  | 1        | 1        |
| 1104 | 9  | 6  | 5  | 5  | 1        | 0.833333 |
| 1201 | 2  | 2  | 0  | 0  | NA       | 0        |
| 1301 | 10 | 10 | 8  | 8  | 1        | 0.8      |
| 1302 | 7  | 6  | 6  | 5  | 0.833333 | 0.833333 |
| 1303 | 9  | 9  | 10 | 9  | 0.9      | 1        |
| 1327 | 1  | 0  | 0  | NA | NA       | NA       |
| 1335 | 1  | 0  | 1  | NA | 0        | NA       |
| 1401 | 3  | 3  | 3  | 3  | 1        | 1        |
| 1501 | 1  | 0  | 0  | NA | NA       | NA       |
| 1503 | 11 | 9  | 9  | 9  | 1        | 1        |

***HLA-DQA1***

|     |    |    |    |    |          |          |
|-----|----|----|----|----|----------|----------|
| 101 | 12 | 11 | 12 | 11 | 0.916667 | 1        |
| 102 | 29 | 24 | 22 | 20 | 0.909091 | 0.833333 |
| 103 | 10 | 9  | 10 | 9  | 0.9      | 1        |
| 201 | 18 | 17 | 17 | 17 | 1        | 1        |
| 301 | 7  | 5  | 5  | 5  | 1        | 1        |
| 401 | 16 | 16 | 16 | 16 | 1        | 1        |
| 501 | 28 | 26 | 26 | 24 | 0.923077 | 0.923077 |

***HLA-DQB1***

|     |    |    |    |    |          |     |
|-----|----|----|----|----|----------|-----|
| 201 | 33 | 30 | 30 | 30 | 1        | 1   |
| 301 | 21 | 19 | 19 | 19 | 1        | 1   |
| 302 | 2  | 1  | 1  | 1  | 1        | 1   |
| 402 | 13 | 13 | 13 | 13 | 1        | 1   |
| 501 | 15 | 12 | 12 | 12 | 1        | 1   |
| 502 | 7  | 6  | 6  | 6  | 1        | 1   |
| 503 | 3  | 2  | 2  | 2  | 1        | 1   |
| 602 | 12 | 10 | 11 | 10 | 0.909091 | 1   |
| 603 | 7  | 6  | 6  | 6  | 1        | 1   |
| 604 | 2  | 2  | 1  | 1  | 1        | 0.5 |
| 605 | 5  | 5  | 5  | 4  | 0.8      | 0.8 |

<sup>a</sup>The numbers in the training and testing sets can differ because (1) alleles that had been imputed were included in the training, but not testing sets and (2) singleton alleles were excluded.

<sup>b</sup>The number of times a given allele was predicted.

<sup>c</sup>Sensitivity represents the number correct divided by the number of calls. Note that calls are reported for a call threshold of 0.

<sup>d</sup>Specificity represents the number correct divided by the number of tests.

**Table S4. Performance of HLA-Allele Predictions in the Training Data for CEU at Four-Digit Resolution**

| Allele              | No. Train | No. Test <sup>a</sup> | No. Call <sup>b</sup> | Correct | Sensitivity <sup>c</sup> | Specificity <sup>d</sup> |
|---------------------|-----------|-----------------------|-----------------------|---------|--------------------------|--------------------------|
| <b><i>HLA-A</i></b> |           |                       |                       |         |                          |                          |
| 101                 | 34        | 32                    | 31                    | 31      | 1                        | 0.96875                  |
| 201                 | 59        | 56                    | 56                    | 56      | 1                        | 1                        |
| 205                 | 2         | 2                     | 2                     | 2       | 1                        | 1                        |
| 206                 | 1         | 0                     | 0                     | NA      | NA                       | NA                       |
| 301                 | 17        | 16                    | 17                    | 16      | 0.941176                 | 1                        |
| 1101                | 7         | 7                     | 7                     | 7       | 1                        | 1                        |
| 2301                | 3         | 3                     | 3                     | 3       | 1                        | 1                        |
| 2402                | 16        | 12                    | 12                    | 12      | 1                        | 1                        |

**American Journal of Human Genetics, Volume 82**

|              |    |    |    |    |          |          |
|--------------|----|----|----|----|----------|----------|
| 2403         | 1  | 0  | 0  | NA | NA       | NA       |
| 2501         | 7  | 6  | 8  | 6  | 0.75     | 1        |
| 2601         | 4  | 4  | 2  | 2  | 1        | 0.5      |
| 2902         | 3  | 3  | 3  | 3  | 1        | 1        |
| 3001         | 1  | 0  | 0  | NA | NA       | NA       |
| 3002         | 1  | 0  | 0  | NA | NA       | NA       |
| 3101         | 6  | 6  | 6  | 6  | 1        | 1        |
| 3201         | 5  | 5  | 5  | 5  | 1        | 1        |
| 6801         | 6  | 5  | 5  | 5  | 1        | 1        |
| <hr/>        |    |    |    |    |          |          |
| <i>HLA-C</i> |    |    |    |    |          |          |
| <hr/>        |    |    |    |    |          |          |
| 102          | 3  | 3  | 3  | 3  | 1        | 1        |
| 202          | 4  | 4  | 4  | 4  | 1        | 1        |
| 303          | 11 | 11 | 10 | 10 | 1        | 0.909091 |
| 304          | 7  | 7  | 8  | 7  | 0.875    | 1        |
| 401          | 15 | 12 | 12 | 12 | 1        | 1        |
| 501          | 21 | 20 | 21 | 20 | 0.952381 | 1        |
| 602          | 21 | 17 | 17 | 17 | 1        | 1        |
| 701          | 32 | 30 | 30 | 29 | 0.966667 | 0.966667 |
| 702          | 37 | 33 | 33 | 32 | 0.969697 | 0.969697 |
| 704          | 5  | 5  | 5  | 5  | 1        | 1        |
| 802          | 3  | 2  | 2  | 2  | 1        | 1        |
| 1202         | 2  | 2  | 2  | 2  | 1        | 1        |
| 1203         | 3  | 3  | 3  | 3  | 1        | 1        |
| 1402         | 3  | 1  | 1  | 1  | 1        | 1        |
| 1502         | 5  | 5  | 5  | 5  | 1        | 1        |
| 1601         | 6  | 6  | 5  | 5  | 1        | 0.833333 |
| 1701         | 1  | 0  | 0  | NA | NA       | NA       |
| <hr/>        |    |    |    |    |          |          |
| <i>HLA-B</i> |    |    |    |    |          |          |
| <hr/>        |    |    |    |    |          |          |
| 702          | 33 | 27 | 28 | 27 | 0.964286 | 1        |
| 801          | 25 | 23 | 21 | 21 | 1        | 0.913043 |
| 1302         | 3  | 3  | 3  | 3  | 1        | 1        |
| 1401         | 1  | 0  | 0  | NA | NA       | NA       |
| 1402         | 2  | 1  | 0  | 0  | NA       | 0        |
| 1501         | 13 | 12 | 12 | 12 | 1        | 1        |
| 1510         | 1  | 0  | 0  | NA | NA       | NA       |
| 1801         | 7  | 6  | 7  | 6  | 0.857143 | 1        |
| 2705         | 1  | 0  | 0  | NA | NA       | NA       |
| 3501         | 9  | 6  | 7  | 6  | 0.857143 | 1        |
| 3503         | 2  | 2  | 0  | 0  | NA       | 0        |
| 3701         | 2  | 2  | 2  | 2  | 1        | 1        |
| 3801         | 1  | 0  | 0  | NA | NA       | NA       |
| 3905         | 1  | 0  | 0  | NA | NA       | NA       |
| 3906         | 2  | 2  | 3  | 2  | 0.666667 | 1        |
| 4001         | 7  | 7  | 7  | 7  | 1        | 1        |
| 4002         | 3  | 3  | 3  | 3  | 1        | 1        |
| 4101         | 1  | 0  | 0  | NA | NA       | NA       |
| 4402         | 22 | 21 | 21 | 21 | 1        | 1        |
| 4403         | 4  | 4  | 4  | 4  | 1        | 1        |
| 4404         | 1  | 0  | 0  | NA | NA       | NA       |
| 4405         | 1  | 0  | 0  | NA | NA       | NA       |
| 4901         | 2  | 2  | 2  | 2  | 1        | 1        |
| 5001         | 3  | 3  | 3  | 3  | 1        | 1        |
| 5101         | 5  | 3  | 4  | 3  | 0.75     | 1        |
| 5201         | 3  | 3  | 2  | 2  | 1        | 0.666667 |

**American Journal of Human Genetics, Volume 82**

|                        |    |    |    |    |          |          |
|------------------------|----|----|----|----|----------|----------|
| 5601                   | 2  | 2  | 3  | 2  | 0.666667 | 1        |
| 5701                   | 11 | 10 | 10 | 10 | 1        | 1        |
| 5801                   | 1  | 0  | 0  | NA | NA       | NA       |
| <b><i>HLA-DRB1</i></b> |    |    |    |    |          |          |
| 101                    | 16 | 13 | 13 | 13 | 1        | 1        |
| 301                    | 17 | 15 | 13 | 13 | 1        | 0.866667 |
| 401                    | 16 | 16 | 11 | 10 | 0.909091 | 0.625    |
| 402                    | 1  | 0  | 0  | NA | NA       | NA       |
| 403                    | 3  | 3  | 1  | 1  | 1        | 0.333333 |
| 404                    | 19 | 16 | 24 | 16 | 0.666667 | 1        |
| 405                    | 1  | 0  | 0  | NA | NA       | NA       |
| 407                    | 2  | 2  | 1  | 1  | 1        | 0.5      |
| 701                    | 18 | 16 | 16 | 16 | 1        | 1        |
| 801                    | 6  | 4  | 4  | 4  | 1        | 1        |
| 1001                   | 1  | 0  | 0  | NA | NA       | NA       |
| 1101                   | 9  | 9  | 11 | 9  | 0.818182 | 1        |
| 1104                   | 1  | 0  | 0  | NA | NA       | NA       |
| 1103                   | 2  | 2  | 0  | 0  | NA       | 0        |
| 1201                   | 1  | 0  | 0  | NA | NA       | NA       |
| 1301                   | 8  | 6  | 7  | 6  | 0.857143 | 1        |
| 1302                   | 4  | 4  | 4  | 4  | 1        | 1        |
| 1303                   | 2  | 2  | 2  | 2  | 1        | 1        |
| 1401                   | 6  | 5  | 5  | 5  | 1        | 1        |
| 1404                   | 1  | 0  | 0  | NA | NA       | NA       |
| 1501                   | 36 | 32 | 33 | 32 | 0.969697 | 1        |
| 1502                   | 1  | 0  | 0  | NA | NA       | NA       |
| 1601                   | 4  | 3  | 3  | 3  | 1        | 1        |
| <b><i>HLA-DQA1</i></b> |    |    |    |    |          |          |
| 101                    | 24 | 23 | 23 | 23 | 1        | 1        |
| 102                    | 43 | 42 | 43 | 42 | 0.976744 | 1        |
| 103                    | 10 | 10 | 10 | 10 | 1        | 1        |
| 201                    | 24 | 23 | 23 | 23 | 1        | 1        |
| 301                    | 41 | 41 | 41 | 41 | 1        | 1        |
| 401                    | 6  | 4  | 4  | 4  | 1        | 1        |
| 501                    | 32 | 31 | 30 | 30 | 1        | 0.967742 |
| <b><i>HLA-DQB1</i></b> |    |    |    |    |          |          |
| 201                    | 28 | 27 | 26 | 26 | 1        | 0.962963 |
| 301                    | 30 | 30 | 30 | 30 | 1        | 1        |
| 302                    | 26 | 26 | 26 | 26 | 1        | 1        |
| 303                    | 11 | 11 | 11 | 11 | 1        | 1        |
| 305                    | 1  | 0  | 0  | NA | NA       | NA       |
| 402                    | 6  | 4  | 4  | 4  | 1        | 1        |
| 501                    | 17 | 17 | 17 | 17 | 1        | 1        |
| 502                    | 4  | 3  | 3  | 3  | 1        | 1        |
| 503                    | 7  | 6  | 6  | 6  | 1        | 1        |
| 601                    | 1  | 0  | 0  | NA | NA       | NA       |
| 602                    | 36 | 35 | 36 | 35 | 0.972222 | 1        |
| 603                    | 9  | 9  | 9  | 9  | 1        | 1        |
| 604                    | 3  | 3  | 3  | 3  | 1        | 1        |
| 609                    | 1  | 0  | 0  | NA | NA       | NA       |

<sup>a</sup>The numbers in the training and testing sets can differ because (1) alleles that had been imputed were included in the training, but not testing sets and (2) singleton alleles were excluded.

<sup>b</sup>The number of times a given allele was predicted.



<sup>c</sup>Sensitivity represents the number correct divided by the number of calls. Note that calls are reported for a call threshold of 0.

<sup>d</sup>Specificity represents the number correct divided by the number of tests.

Table S5. Performance of HLA-Allele Predictions in the Validation Data (1958 Birth Cohort) at Two-Digit Resolution with the Affymetrix 500K SNP Data

| Allele          | No. Database <sup>a</sup> | No. Test | No. Call | Correct | Sensitivity <sup>b</sup> | Specificity <sup>c</sup> |
|-----------------|---------------------------|----------|----------|---------|--------------------------|--------------------------|
| <i>HLA-A</i>    |                           |          |          |         |                          |                          |
| 1               | 34                        | 322      | 321      | 315     | 0.98                     | 0.98                     |
| 2               | 64                        | 541      | 558      | 532     | 0.95                     | 0.98                     |
| 3               | 16                        | 249      | 246      | 246     | 1.00                     | 0.99                     |
| 11              | 7                         | 118      | 110      | 108     | 0.98                     | 0.92                     |
| 23              | 3                         | 27       | 47       | 27      | 0.57                     | 1.00                     |
| 24              | 13                        | 128      | 121      | 116     | 0.96                     | 0.91                     |
| 25              | 6                         | 27       | 45       | 23      | 0.51                     | 0.85                     |
| 26              | 4                         | 43       | 42       | 25      | 0.60                     | 0.58                     |
| 29              | 4                         | 76       | 83       | 74      | 0.89                     | 0.97                     |
| 30              | 2                         | 47       | 28       | 20      | 0.71                     | 0.43                     |
| 31              | 6                         | 49       | 60       | 47      | 0.78                     | 0.96                     |
| 32              | 5                         | 73       | 73       | 70      | 0.96                     | 0.96                     |
| 33              | 0                         | 12       | 0        | 0       | NA                       | 0.00                     |
| 34              | 0                         | 1        | 0        | 0       | NA                       | 0.00                     |
| 66              | 0                         | 5        | 0        | 0       | NA                       | 0.00                     |
| 68              | 5                         | 73       | 58       | 58      | 1.00                     | 0.79                     |
| 74              | 0                         | 1        | 0        | 0       | NA                       | 0.00                     |
| <i>HLA-B</i>    |                           |          |          |         |                          |                          |
| 7               | 27                        | 243      | 228      | 223     | 0.98                     | 0.92                     |
| 8               | 23                        | 225      | 222      | 217     | 0.98                     | 0.96                     |
| 13              | 3                         | 25       | 55       | 25      | 0.45                     | 1.00                     |
| 14              | 3                         | 72       | 84       | 68      | 0.81                     | 0.94                     |
| 15              | 14                        | 146      | 168      | 133     | 0.79                     | 0.91                     |
| 18              | 6                         | 65       | 58       | 52      | 0.90                     | 0.80                     |
| 27              | 3                         | 74       | 28       | 24      | 0.86                     | 0.32                     |
| 35              | 10                        | 108      | 99       | 82      | 0.83                     | 0.76                     |
| 37              | 2                         | 28       | 28       | 23      | 0.82                     | 0.82                     |
| 38              | 1                         | 11       | 25       | 10      | 0.40                     | 0.91                     |
| 39              | 3                         | 32       | 33       | 19      | 0.58                     | 0.59                     |
| 40              | 10                        | 122      | 162      | 122     | 0.75                     | 1.00                     |
| 41              | 1                         | 9        | 7        | 7       | 1.00                     | 0.78                     |
| 44              | 28                        | 286      | 281      | 272     | 0.97                     | 0.95                     |
| 45              | 0                         | 14       | 0        | 0       | NA                       | 0.00                     |
| 47              | 0                         | 4        | 0        | 0       | NA                       | 0.00                     |
| 49              | 2                         | 17       | 26       | 14      | 0.54                     | 0.82                     |
| 50              | 3                         | 16       | 33       | 15      | 0.45                     | 0.94                     |
| 51              | 6                         | 65       | 43       | 36      | 0.84                     | 0.55                     |
| 52              | 3                         | 14       | 29       | 13      | 0.45                     | 0.93                     |
| 53              | 0                         | 2        | 0        | 0       | NA                       | 0.00                     |
| 55              | 2                         | 41       | 0        | 0       | NA                       | 0.00                     |
| 56              | 2                         | 8        | 18       | 7       | 0.39                     | 0.88                     |
| 57              | 10                        | 70       | 67       | 65      | 0.97                     | 0.93                     |
| 58              | 1                         | 11       | 14       | 5       | 0.36                     | 0.45                     |
| <i>HLA-DRB1</i> |                           |          |          |         |                          |                          |

|    |    |     |     |     |      |      |
|----|----|-----|-----|-----|------|------|
| 1  | 13 | 207 | 175 | 173 | 0.99 | 0.84 |
| 3  | 16 | 231 | 218 | 202 | 0.93 | 0.87 |
| 4  | 39 | 392 | 463 | 392 | 0.85 | 1.00 |
| 7  | 21 | 253 | 253 | 226 | 0.89 | 0.89 |
| 8  | 4  | 43  | 38  | 37  | 0.97 | 0.86 |
| 9  | 0  | 30  | 0   | 0   | NA   | 0.00 |
| 10 | 1  | 11  | 10  | 3   | 0.30 | 0.27 |
| 11 | 12 | 119 | 125 | 102 | 0.82 | 0.86 |
| 12 | 1  | 29  | 33  | 23  | 0.70 | 0.79 |
| 13 | 12 | 176 | 131 | 118 | 0.90 | 0.67 |
| 14 | 6  | 36  | 74  | 28  | 0.38 | 0.78 |
| 15 | 33 | 258 | 245 | 235 | 0.96 | 0.91 |
| 16 | 3  | 13  | 33  | 8   | 0.24 | 0.62 |

*HLA-DQB1*

|   |    |     |     |     |      |      |
|---|----|-----|-----|-----|------|------|
| 2 | 28 | 397 | 345 | 333 | 0.97 | 0.84 |
| 3 | 68 | 658 | 625 | 592 | 0.95 | 0.90 |
| 4 | 4  | 47  | 34  | 34  | 1.00 | 0.72 |
| 5 | 26 | 261 | 314 | 235 | 0.75 | 0.90 |
| 6 | 49 | 411 | 456 | 399 | 0.88 | 0.97 |

<sup>a</sup>Only the CEU population data was used in predicting HLA alleles in the 1958 birth cohort data.

<sup>b</sup>Sensitivity represents the number correct divided by the number of calls. Note that calls are reported for a call threshold of 0.

<sup>c</sup>Specificity represents the number correct divided by the number of tests.

Table S6. Performance of HLA-Allele Predictions in the Validation Data (1958 Birth Cohort) at Two-Digit Resolution with the Illumina 550K and 15K SNP Data

| Allele       | No. Database <sup>a</sup> | No. Test | No. Call | Correct | Sensitivity <sup>b</sup> | Specificity <sup>c</sup> |
|--------------|---------------------------|----------|----------|---------|--------------------------|--------------------------|
| <i>HLA-A</i> |                           |          |          |         |                          |                          |
| 1            | 34                        | 322      | 322      | 317     | 0.98                     | 0.98                     |
| 2            | 64                        | 541      | 574      | 541     | 0.94                     | 1.00                     |
| 3            | 16                        | 249      | 233      | 233     | 1.00                     | 0.94                     |
| 11           | 7                         | 118      | 112      | 108     | 0.96                     | 0.92                     |
| 23           | 3                         | 27       | 28       | 25      | 0.89                     | 0.93                     |
| 24           | 13                        | 128      | 121      | 120     | 0.99                     | 0.94                     |
| 25           | 6                         | 27       | 39       | 24      | 0.62                     | 0.89                     |
| 26           | 4                         | 43       | 36       | 28      | 0.78                     | 0.65                     |
| 29           | 4                         | 76       | 72       | 71      | 0.99                     | 0.93                     |
| 30           | 2                         | 47       | 53       | 44      | 0.83                     | 0.94                     |
| 31           | 6                         | 49       | 59       | 47      | 0.80                     | 0.96                     |
| 32           | 5                         | 73       | 75       | 73      | 0.97                     | 1.00                     |
| 33           | 0                         | 12       | 0        | 0       | NA                       | 0.00                     |
| 34           | 0                         | 1        | 0        | 0       | NA                       | 0.00                     |
| 66           | 0                         | 5        | 0        | 0       | NA                       | 0.00                     |
| 68           | 5                         | 73       | 68       | 67      | 0.99                     | 0.92                     |
| 74           | 0                         | 1        | 0        | 0       | NA                       | 0.00                     |
| <i>HLA-B</i> |                           |          |          |         |                          |                          |
| 7            | 27                        | 243      | 264      | 231     | 0.88                     | 0.95                     |
| 8            | 23                        | 225      | 221      | 219     | 0.99                     | 0.97                     |
| 13           | 3                         | 25       | 37       | 24      | 0.65                     | 0.96                     |
| 14           | 3                         | 72       | 25       | 23      | 0.92                     | 0.32                     |
| 15           | 14                        | 146      | 140      | 138     | 0.99                     | 0.95                     |
| 18           | 6                         | 65       | 70       | 62      | 0.89                     | 0.95                     |

|                 |    |     |     |     |      |      |
|-----------------|----|-----|-----|-----|------|------|
| 27              | 3  | 74  | 45  | 37  | 0.82 | 0.50 |
| 35              | 10 | 108 | 102 | 96  | 0.94 | 0.89 |
| 37              | 2  | 28  | 27  | 21  | 0.78 | 0.75 |
| 38              | 1  | 11  | 18  | 10  | 0.56 | 0.91 |
| 39              | 3  | 32  | 77  | 24  | 0.31 | 0.75 |
| 40              | 10 | 122 | 151 | 121 | 0.80 | 0.99 |
| 41              | 1  | 9   | 9   | 7   | 0.78 | 0.78 |
| 44              | 28 | 286 | 278 | 267 | 0.96 | 0.93 |
| 45              | 0  | 14  | 0   | 0   | NA   | 0.00 |
| 47              | 0  | 4   | 0   | 0   | NA   | 0.00 |
| 49              | 2  | 17  | 31  | 15  | 0.48 | 0.88 |
| 50              | 3  | 16  | 20  | 15  | 0.75 | 0.94 |
| 51              | 6  | 65  | 46  | 45  | 0.98 | 0.69 |
| 52              | 3  | 14  | 30  | 14  | 0.47 | 1.00 |
| 53              | 0  | 2   | 0   | 0   | NA   | 0.00 |
| 55              | 2  | 41  | 0   | 0   | NA   | 0.00 |
| 56              | 2  | 8   | 44  | 7   | 0.16 | 0.88 |
| 57              | 10 | 70  | 66  | 65  | 0.98 | 0.93 |
| 58              | 1  | 11  | 7   | 6   | 0.86 | 0.55 |
| <b>HLA-DRB1</b> |    |     |     |     |      |      |
| 1               | 13 | 207 | 178 | 176 | 0.99 | 0.85 |
| 3               | 16 | 231 | 240 | 209 | 0.87 | 0.90 |
| 4               | 39 | 392 | 470 | 392 | 0.83 | 1.00 |
| 7               | 21 | 253 | 248 | 230 | 0.93 | 0.91 |
| 8               | 4  | 43  | 38  | 38  | 1.00 | 0.88 |
| 9               | 0  | 30  | 0   | 0   | NA   | 0.00 |
| 10              | 1  | 11  | 4   | 0   | 0.00 | 0.00 |
| 11              | 12 | 119 | 125 | 111 | 0.89 | 0.93 |
| 12              | 1  | 29  | 32  | 20  | 0.63 | 0.69 |
| 13              | 12 | 176 | 128 | 108 | 0.84 | 0.61 |
| 14              | 6  | 36  | 70  | 25  | 0.36 | 0.69 |
| 15              | 33 | 258 | 244 | 240 | 0.98 | 0.93 |
| 16              | 3  | 13  | 21  | 12  | 0.57 | 0.92 |
| <b>HLA-DQB1</b> |    |     |     |     |      |      |
| 2               | 28 | 397 | 386 | 380 | 0.98 | 0.96 |
| 3               | 68 | 658 | 655 | 621 | 0.95 | 0.94 |
| 4               | 4  | 47  | 44  | 42  | 0.95 | 0.89 |
| 5               | 26 | 261 | 278 | 228 | 0.82 | 0.87 |
| 6               | 49 | 411 | 411 | 380 | 0.92 | 0.92 |

<sup>a</sup>Only the CEU population data was used in predicting HLA alleles in the 1958 birth cohort data.

<sup>b</sup>Sensitivity represents the number correct divided by the number of calls. Note that calls are reported for a call threshold of 0.

<sup>c</sup>Specificity represents the number correct divided by the number of tests.

Table S7. Performance of HLA-Allele Predictions in the Validation Data (1958 Birth Cohort) at Four-Digit Resolution with the Affymetrix 500K SNP Data

| Allele       | No. Database <sup>a</sup> | No. Test | No. Call | Correct | Sensitivity <sup>b</sup> | Specificity <sup>c</sup> |
|--------------|---------------------------|----------|----------|---------|--------------------------|--------------------------|
| <b>HLA-A</b> |                           |          |          |         |                          |                          |
| 101          | 32                        | 230      | 231      | 226     | 0.98                     | 0.98                     |
| 201          | 57                        | 0        | 16       | 0       | 0.00                     | NA                       |
| 202          | 0                         | 1        | 0        | 0       | NA                       | 0.00                     |
| 205          | 2                         | 15       | 19       | 13      | 0.68                     | 0.87                     |

**American Journal of Human Genetics, Volume 82**

|              |    |     |     |     |      |      |
|--------------|----|-----|-----|-----|------|------|
| 206          | 1  | 1   | 6   | 0   | 0.00 | 0.00 |
| 301          | 16 | 175 | 173 | 172 | 0.99 | 0.98 |
| 302          | 0  | 1   | 0   | 0   | NA   | 0.00 |
| 1101         | 7  | 84  | 75  | 74  | 0.99 | 0.88 |
| 1119         | 0  | 1   | 0   | 0   | NA   | 0.00 |
| 2301         | 3  | 19  | 38  | 19  | 0.50 | 1.00 |
| 2402         | 12 | 83  | 69  | 68  | 0.99 | 0.82 |
| 2403         | 1  | 1   | 8   | 0   | 0.00 | 0.00 |
| 2501         | 6  | 18  | 28  | 16  | 0.57 | 0.89 |
| 2601         | 4  | 23  | 20  | 13  | 0.65 | 0.57 |
| 2608         | 0  | 2   | 0   | 0   | NA   | 0.00 |
| 2902         | 3  | 55  | 58  | 53  | 0.91 | 0.96 |
| 3001         | 1  | 17  | 22  | 16  | 0.73 | 0.94 |
| 3002         | 1  | 16  | 0   | 0   | NA   | 0.00 |
| 3004         | 0  | 1   | 0   | 0   | NA   | 0.00 |
| 3101         | 6  | 35  | 34  | 33  | 0.97 | 0.94 |
| 3201         | 5  | 39  | 39  | 37  | 0.95 | 0.95 |
| 3402         | 0  | 1   | 0   | 0   | NA   | 0.00 |
| 6601         | 0  | 5   | 0   | 0   | NA   | 0.00 |
| 6801         | 5  | 49  | 40  | 40  | 1.00 | 0.82 |
| 6802         | 0  | 3   | 0   | 0   | NA   | 0.00 |
| 7406         | 0  | 1   | 0   | 0   | NA   | 0.00 |
| <hr/>        |    |     |     |     |      |      |
| <i>HLA-B</i> |    |     |     |     |      |      |
| 702          | 27 | 239 | 224 | 220 | 0.98 | 0.92 |
| 801          | 23 | 224 | 221 | 216 | 0.98 | 0.96 |
| 1302         | 3  | 25  | 55  | 25  | 0.45 | 1.00 |
| 1401         | 1  | 28  | 26  | 23  | 0.88 | 0.82 |
| 1402         | 1  | 43  | 57  | 43  | 0.75 | 1.00 |
| 1501         | 12 | 118 | 141 | 107 | 0.76 | 0.91 |
| 1503         | 0  | 2   | 0   | 0   | NA   | 0.00 |
| 1507         | 0  | 1   | 0   | 0   | NA   | 0.00 |
| 1510         | 1  | 0   | 10  | 0   | 0.00 | NA   |
| 1516         | 0  | 3   | 0   | 0   | NA   | 0.00 |
| 1517         | 0  | 4   | 0   | 0   | NA   | 0.00 |
| 1518         | 0  | 6   | 0   | 0   | NA   | 0.00 |
| 1801         | 6  | 62  | 55  | 50  | 0.91 | 0.81 |
| 2701         | 0  | 1   | 0   | 0   | NA   | 0.00 |
| 2702         | 0  | 2   | 0   | 0   | NA   | 0.00 |
| 2705         | 1  | 71  | 28  | 23  | 0.82 | 0.32 |
| 3501         | 7  | 62  | 64  | 51  | 0.80 | 0.82 |
| 3502         | 0  | 5   | 0   | 0   | NA   | 0.00 |
| 3503         | 2  | 8   | 11  | 7   | 0.64 | 0.88 |
| 3508         | 0  | 4   | 0   | 0   | NA   | 0.00 |
| 3701         | 2  | 28  | 28  | 23  | 0.82 | 0.82 |
| 3801         | 1  | 11  | 24  | 10  | 0.42 | 0.91 |
| 3901         | 0  | 15  | 0   | 0   | NA   | 0.00 |
| 3905         | 1  | 0   | 1   | 0   | 0.00 | NA   |
| 3906         | 2  | 15  | 31  | 15  | 0.48 | 1.00 |
| 4001         | 7  | 112 | 109 | 107 | 0.98 | 0.96 |
| 4002         | 3  | 9   | 49  | 9   | 0.18 | 1.00 |
| 4101         | 1  | 4   | 5   | 2   | 0.40 | 0.50 |
| 4102         | 0  | 3   | 0   | 0   | NA   | 0.00 |
| 4402         | 21 | 188 | 178 | 174 | 0.98 | 0.93 |
| 4403         | 4  | 85  | 83  | 76  | 0.92 | 0.89 |
| 4404         | 1  | 3   | 5   | 1   | 0.20 | 0.33 |
| 4405         | 1  | 1   | 6   | 1   | 0.17 | 1.00 |

**American Journal of Human Genetics, Volume 82**

|      |    |    |    |    |      |      |
|------|----|----|----|----|------|------|
| 4501 | 0  | 14 | 0  | 0  | NA   | 0.00 |
| 4701 | 0  | 4  | 0  | 0  | NA   | 0.00 |
| 4901 | 2  | 17 | 26 | 14 | 0.54 | 0.82 |
| 5001 | 3  | 16 | 33 | 15 | 0.45 | 0.94 |
| 5101 | 3  | 58 | 41 | 34 | 0.83 | 0.59 |
| 5201 | 3  | 14 | 26 | 13 | 0.50 | 0.93 |
| 5301 | 0  | 2  | 0  | 0  | NA   | 0.00 |
| 5501 | 0  | 41 | 0  | 0  | NA   | 0.00 |
| 5601 | 2  | 8  | 18 | 7  | 0.39 | 0.88 |
| 5701 | 10 | 63 | 61 | 59 | 0.97 | 0.94 |
| 5801 | 1  | 11 | 14 | 5  | 0.36 | 0.45 |

***HLA-DRB1***

|      |    |     |     |     |      |      |
|------|----|-----|-----|-----|------|------|
| 101  | 13 | 4   | 28  | 3   | 0.11 | 0.75 |
| 102  | 0  | 5   | 0   | 0   | NA   | 0.00 |
| 103  | 0  | 23  | 0   | 0   | NA   | 0.00 |
| 104  | 0  | 1   | 0   | 0   | NA   | 0.00 |
| 301  | 16 | 169 | 151 | 145 | 0.96 | 0.86 |
| 401  | 16 | 133 | 156 | 111 | 0.71 | 0.83 |
| 402  | 1  | 4   | 5   | 0   | 0.00 | 0.00 |
| 403  | 3  | 43  | 9   | 3   | 0.33 | 0.07 |
| 404  | 16 | 60  | 86  | 44  | 0.51 | 0.73 |
| 405  | 1  | 6   | 8   | 2   | 0.25 | 0.33 |
| 407  | 2  | 3   | 13  | 0   | 0.00 | 0.00 |
| 701  | 16 | 177 | 172 | 159 | 0.92 | 0.90 |
| 801  | 4  | 19  | 18  | 18  | 1.00 | 0.95 |
| 804  | 0  | 1   | 0   | 0   | NA   | 0.00 |
| 901  | 0  | 18  | 0   | 0   | NA   | 0.00 |
| 1001 | 1  | 4   | 5   | 1   | 0.20 | 0.25 |
| 1101 | 9  | 23  | 38  | 21  | 0.55 | 0.91 |
| 1102 | 0  | 4   | 0   | 0   | NA   | 0.00 |
| 1103 | 2  | 6   | 4   | 1   | 0.25 | 0.17 |
| 1104 | 1  | 6   | 0   | 0   | NA   | 0.00 |
| 1201 | 1  | 17  | 17  | 12  | 0.71 | 0.71 |
| 1301 | 6  | 20  | 10  | 8   | 0.80 | 0.40 |
| 1302 | 4  | 13  | 12  | 9   | 0.75 | 0.69 |
| 1303 | 2  | 12  | 12  | 11  | 0.92 | 0.92 |
| 1401 | 5  | 27  | 42  | 21  | 0.50 | 0.78 |
| 1404 | 1  | 0   | 4   | 0   | 0.00 | NA   |
| 1501 | 32 | 26  | 25  | 24  | 0.96 | 0.92 |
| 1502 | 1  | 2   | 4   | 1   | 0.25 | 0.50 |
| 1601 | 3  | 7   | 15  | 4   | 0.27 | 0.57 |
| 1602 | 0  | 1   | 0   | 0   | NA   | 0.00 |

***HLA-DQB1***

|     |    |     |     |     |      |      |
|-----|----|-----|-----|-----|------|------|
| 201 | 28 | 0   | 13  | 0   | 0.00 | NA   |
| 203 | 0  | 1   | 0   | 0   | NA   | 0.00 |
| 301 | 30 | 270 | 252 | 211 | 0.84 | 0.78 |
| 302 | 26 | 167 | 145 | 128 | 0.88 | 0.77 |
| 303 | 11 | 77  | 63  | 49  | 0.78 | 0.64 |
| 305 | 1  | 0   | 18  | 0   | 0.00 | NA   |
| 402 | 4  | 39  | 28  | 28  | 1.00 | 0.72 |
| 501 | 17 | 168 | 148 | 142 | 0.96 | 0.85 |
| 502 | 3  | 10  | 33  | 2   | 0.06 | 0.20 |
| 503 | 6  | 28  | 51  | 23  | 0.45 | 0.82 |
| 504 | 0  | 1   | 0   | 0   | NA   | 0.00 |
| 601 | 1  | 8   | 12  | 0   | 0.00 | 0.00 |

**American Journal of Human Genetics, Volume 82**

|     |    |     |     |     |      |      |
|-----|----|-----|-----|-----|------|------|
| 602 | 35 | 195 | 172 | 164 | 0.95 | 0.84 |
| 603 | 9  | 64  | 92  | 51  | 0.55 | 0.80 |
| 604 | 3  | 42  | 40  | 34  | 0.85 | 0.81 |
| 609 | 1  | 18  | 21  | 5   | 0.24 | 0.28 |

<sup>a</sup>Only the CEU population data was used in predicting HLA alleles in the 1958 birth cohort data.

<sup>b</sup>Sensitivity represents the number correct divided by the number of calls. Note that calls are reported for a call threshold of 0.

<sup>c</sup>Specificity represents the number correct divided by the number of tests.

Table S8. Performance of HLA-Allele Predictions in the VALIDATION data (1958 Birth Cohort) at Four-Digit Resolution with the Illumina 550K and 15K SNP Data

| Allele       | No. Database <sup>a</sup> | No. Test | No. Call | Correct | Sensitivity <sup>b</sup> | Specificity <sup>c</sup> |
|--------------|---------------------------|----------|----------|---------|--------------------------|--------------------------|
| <i>HLA-A</i> |                           |          |          |         |                          |                          |
| 101          | 32                        | 230      | 232      | 227     | 0.98                     | 0.99                     |
| 201          | 57                        | 0        | 19       | 0       | 0.00                     | NA                       |
| 202          | 0                         | 1        | 0        | 0       | NA                       | 0.00                     |
| 205          | 2                         | 15       | 17       | 14      | 0.82                     | 0.93                     |
| 206          | 1                         | 1        | 2        | 0       | 0.00                     | 0.00                     |
| 301          | 16                        | 175      | 163      | 162     | 0.99                     | 0.93                     |
| 302          | 0                         | 1        | 0        | 0       | NA                       | 0.00                     |
| 1101         | 7                         | 84       | 79       | 77      | 0.97                     | 0.92                     |
| 1119         | 0                         | 1        | 0        | 0       | NA                       | 0.00                     |
| 2301         | 3                         | 19       | 21       | 18      | 0.86                     | 0.95                     |
| 2402         | 12                        | 83       | 72       | 70      | 0.97                     | 0.84                     |
| 2403         | 1                         | 1        | 7        | 0       | 0.00                     | 0.00                     |
| 2501         | 6                         | 18       | 25       | 16      | 0.64                     | 0.89                     |
| 2601         | 4                         | 23       | 23       | 16      | 0.70                     | 0.70                     |
| 2608         | 0                         | 2        | 0        | 0       | NA                       | 0.00                     |
| 2902         | 3                         | 55       | 53       | 52      | 0.98                     | 0.95                     |
| 3001         | 1                         | 17       | 18       | 17      | 0.94                     | 1.00                     |
| 3002         | 1                         | 16       | 23       | 14      | 0.61                     | 0.88                     |
| 3004         | 0                         | 1        | 0        | 0       | NA                       | 0.00                     |
| 3101         | 6                         | 35       | 33       | 33      | 1.00                     | 0.94                     |
| 3201         | 5                         | 39       | 40       | 39      | 0.98                     | 1.00                     |
| 3402         | 0                         | 1        | 0        | 0       | NA                       | 0.00                     |
| 6601         | 0                         | 5        | 0        | 0       | NA                       | 0.00                     |
| 6801         | 5                         | 49       | 49       | 45      | 0.92                     | 0.92                     |
| 6802         | 0                         | 3        | 0        | 0       | NA                       | 0.00                     |
| 7406         | 0                         | 1        | 0        | 0       | NA                       | 0.00                     |
| <i>HLA-B</i> |                           |          |          |         |                          |                          |
| 702          | 27                        | 239      | 259      | 228     | 0.88                     | 0.95                     |
| 801          | 23                        | 224      | 220      | 218     | 0.99                     | 0.97                     |
| 1302         | 3                         | 25       | 37       | 24      | 0.65                     | 0.96                     |
| 1401         | 1                         | 28       | 23       | 23      | 1.00                     | 0.82                     |
| 1402         | 1                         | 43       | 1        | 0       | 0.00                     | 0.00                     |
| 1501         | 12                        | 118      | 119      | 110     | 0.92                     | 0.93                     |
| 1503         | 0                         | 2        | 0        | 0       | NA                       | 0.00                     |
| 1507         | 0                         | 1        | 0        | 0       | NA                       | 0.00                     |
| 1510         | 1                         | 0        | 10       | 0       | 0.00                     | NA                       |
| 1516         | 0                         | 3        | 0        | 0       | NA                       | 0.00                     |
| 1517         | 0                         | 4        | 0        | 0       | NA                       | 0.00                     |
| 1518         | 0                         | 6        | 0        | 0       | NA                       | 0.00                     |
| 1801         | 6                         | 62       | 67       | 59      | 0.88                     | 0.95                     |

American Journal of Human Genetics, Volume 82

|                 |    |     |     |     |      |      |
|-----------------|----|-----|-----|-----|------|------|
| 2701            | 0  | 1   | 0   | 0   | NA   | 0.00 |
| 2702            | 0  | 2   | 0   | 0   | NA   | 0.00 |
| 2705            | 1  | 71  | 45  | 35  | 0.78 | 0.49 |
| 3501            | 7  | 62  | 64  | 50  | 0.78 | 0.81 |
| 3502            | 0  | 5   | 0   | 0   | NA   | 0.00 |
| 3503            | 2  | 8   | 10  | 5   | 0.50 | 0.63 |
| 3508            | 0  | 4   | 0   | 0   | NA   | 0.00 |
| 3701            | 2  | 28  | 27  | 21  | 0.78 | 0.75 |
| 3801            | 1  | 11  | 18  | 10  | 0.56 | 0.91 |
| 3901            | 0  | 15  | 0   | 0   | NA   | 0.00 |
| 3905            | 1  | 0   | 1   | 0   | 0.00 | NA   |
| 3906            | 2  | 15  | 72  | 15  | 0.21 | 1.00 |
| 4001            | 7  | 112 | 109 | 108 | 0.99 | 0.96 |
| 4002            | 3  | 9   | 41  | 9   | 0.22 | 1.00 |
| 4101            | 1  | 4   | 7   | 2   | 0.29 | 0.50 |
| 4102            | 0  | 3   | 0   | 0   | NA   | 0.00 |
| 4402            | 21 | 188 | 175 | 173 | 0.99 | 0.92 |
| 4403            | 4  | 85  | 91  | 77  | 0.85 | 0.91 |
| 4404            | 1  | 3   | 2   | 0   | 0.00 | 0.00 |
| 4405            | 1  | 1   | 1   | 0   | 0.00 | 0.00 |
| 4501            | 0  | 14  | 0   | 0   | NA   | 0.00 |
| 4701            | 0  | 4   | 0   | 0   | NA   | 0.00 |
| 4901            | 2  | 17  | 30  | 15  | 0.50 | 0.88 |
| 5001            | 3  | 16  | 20  | 15  | 0.75 | 0.94 |
| 5101            | 3  | 58  | 41  | 40  | 0.98 | 0.69 |
| 5201            | 3  | 14  | 29  | 14  | 0.48 | 1.00 |
| 5301            | 0  | 2   | 0   | 0   | NA   | 0.00 |
| 5501            | 0  | 41  | 0   | 0   | NA   | 0.00 |
| 5601            | 2  | 8   | 44  | 7   | 0.16 | 0.88 |
| 5701            | 10 | 63  | 60  | 59  | 0.98 | 0.94 |
| 5801            | 1  | 11  | 7   | 6   | 0.86 | 0.55 |
| <hr/>           |    |     |     |     |      |      |
| <i>HLA-DRB1</i> |    |     |     |     |      |      |
| 101             | 13 | 4   | 26  | 3   | 0.12 | 0.75 |
| 102             | 0  | 5   | 0   | 0   | NA   | 0.00 |
| 103             | 0  | 23  | 0   | 0   | NA   | 0.00 |
| 104             | 0  | 1   | 0   | 0   | NA   | 0.00 |
| 301             | 16 | 169 | 152 | 147 | 0.97 | 0.87 |
| 401             | 16 | 133 | 143 | 114 | 0.80 | 0.86 |
| 402             | 1  | 4   | 19  | 3   | 0.16 | 0.75 |
| 403             | 3  | 43  | 18  | 3   | 0.17 | 0.07 |
| 404             | 16 | 60  | 85  | 46  | 0.54 | 0.77 |
| 405             | 1  | 6   | 2   | 0   | 0.00 | 0.00 |
| 407             | 2  | 3   | 13  | 0   | 0.00 | 0.00 |
| 701             | 16 | 177 | 169 | 161 | 0.95 | 0.91 |
| 801             | 4  | 19  | 17  | 17  | 1.00 | 0.89 |
| 804             | 0  | 1   | 0   | 0   | NA   | 0.00 |
| 901             | 0  | 18  | 0   | 0   | NA   | 0.00 |
| 1001            | 1  | 4   | 3   | 0   | 0.00 | 0.00 |
| 1101            | 9  | 23  | 35  | 20  | 0.57 | 0.87 |
| 1102            | 0  | 4   | 0   | 0   | NA   | 0.00 |
| 1103            | 2  | 6   | 4   | 1   | 0.25 | 0.17 |
| 1104            | 1  | 6   | 5   | 0   | 0.00 | 0.00 |
| 1201            | 1  | 17  | 15  | 11  | 0.73 | 0.65 |
| 1301            | 6  | 20  | 13  | 11  | 0.85 | 0.55 |
| 1302            | 4  | 13  | 12  | 9   | 0.75 | 0.69 |
| 1303            | 2  | 12  | 17  | 10  | 0.59 | 0.83 |

|                 |    |     |     |     |      |      |
|-----------------|----|-----|-----|-----|------|------|
| 1401            | 5  | 27  | 45  | 20  | 0.44 | 0.74 |
| 1404            | 1  | 0   | 0   | 0   | NA   | NA   |
| 1501            | 32 | 26  | 26  | 25  | 0.96 | 0.96 |
| 1502            | 1  | 2   | 5   | 2   | 0.40 | 1.00 |
| 1601            | 3  | 7   | 10  | 7   | 0.70 | 1.00 |
| 1602            | 0  | 1   | 0   | 0   | NA   | 0.00 |
| <hr/>           |    |     |     |     |      |      |
| <i>HLA-DQB1</i> |    |     |     |     |      |      |
| 201             | 28 | 0   | 7   | 0   | 0.00 | NA   |
| 203             | 0  | 1   | 0   | 0   | NA   | 0.00 |
| 301             | 30 | 270 | 253 | 250 | 0.99 | 0.93 |
| 302             | 26 | 167 | 189 | 164 | 0.87 | 0.98 |
| 303             | 11 | 77  | 53  | 50  | 0.94 | 0.65 |
| 305             | 1  | 0   | 8   | 0   | 0.00 | NA   |
| 402             | 4  | 39  | 38  | 36  | 0.95 | 0.92 |
| 501             | 17 | 168 | 148 | 136 | 0.92 | 0.81 |
| 502             | 3  | 10  | 13  | 10  | 0.77 | 1.00 |
| 503             | 6  | 28  | 56  | 25  | 0.45 | 0.89 |
| 504             | 0  | 1   | 0   | 0   | NA   | 0.00 |
| 601             | 1  | 8   | 13  | 6   | 0.46 | 0.75 |
| 602             | 35 | 195 | 181 | 176 | 0.97 | 0.90 |
| 603             | 9  | 64  | 67  | 42  | 0.63 | 0.66 |
| 604             | 3  | 42  | 44  | 34  | 0.77 | 0.81 |
| 609             | 1  | 18  | 18  | 15  | 0.83 | 0.83 |

<sup>a</sup>Only the CEU population data was used in predicting HLA alleles in the 1958 birth cohort data.

<sup>b</sup>Sensitivity represents the number correct divided by the number of calls. Note that calls are reported for a call threshold of 0.

<sup>c</sup>Specificity represents the number correct divided by the number of tests.

Table S9. Minimal SNP Prediction Sets in CEU and YRI

| rsID      | Position           | <i>HLA-A</i>     | <i>HLA-C</i> | <i>HLA-B</i> | <i>HLA-DRB1</i> | <i>HLA-DQA1</i> | <i>HLA-DQB1</i> |
|-----------|--------------------|------------------|--------------|--------------|-----------------|-----------------|-----------------|
|           | NCBI Build 34 (bp) |                  |              |              |                 |                 |                 |
| rs1632933 | 29905944           | -/+ <sup>a</sup> | -/-          | -/-          | -/-             | -/-             | -/-             |
| rs885928  | 29949566           | +/-              | -/-          | -/-          | -/-             | -/-             | -/-             |
| rs2844821 | 29950109           | +/-              | -/-          | -/-          | -/-             | -/-             | -/-             |
| rs2508042 | 29994117           | +/-              | -/-          | -/-          | -/-             | -/-             | -/-             |
| rs2157680 | 30018226           | +/-              | -/-          | -/-          | -/-             | -/-             | -/-             |
| rs3823339 | 30018808           | +/-              | -/-          | -/-          | -/-             | -/-             | -/-             |
| rs3823343 | 30018951           | +/+              | -/-          | -/-          | -/-             | -/-             | -/-             |
| rs1061235 | 30019138           | +/-              | -/-          | -/-          | -/-             | -/-             | -/-             |
| rs2499    | 30019382           | +/-              | -/-          | -/-          | -/-             | -/-             | -/-             |
| rs6921314 | 30020060           | +/-              | -/-          | -/-          | -/-             | -/-             | -/-             |
| rs2735097 | 30021141           | -/+              | -/-          | -/-          | -/-             | -/-             | -/-             |
| rs7745413 | 30021309           | +/+              | -/-          | -/-          | -/-             | -/-             | -/-             |
| rs1632880 | 30023450           | +/-              | -/-          | -/-          | -/-             | -/-             | -/-             |
| rs7747114 | 30025614           | +/-              | -/-          | -/-          | -/-             | -/-             | -/-             |
| rs1655912 | 30026305           | +/-              | -/-          | -/-          | -/-             | -/-             | -/-             |
| rs3893538 | 30030261           | +/-              | -/-          | -/-          | -/-             | -/-             | -/-             |
| rs2256543 | 30043671           | +/+              | -/-          | -/-          | -/-             | -/-             | -/-             |
| rs6457116 | 30043863           | +/-              | -/-          | -/-          | -/-             | -/-             | -/-             |
| rs7754245 | 30044316           | -/+              | -/-          | -/-          | -/-             | -/-             | -/-             |
| rs2523969 | 30044615           | +/-              | -/-          | -/-          | -/-             | -/-             | -/-             |
| rs435766  | 30045689           | +/-              | -/-          | -/-          | -/-             | -/-             | -/-             |



American Journal of Human Genetics, Volume 82

|           |          |     |     |     |     |     |     |
|-----------|----------|-----|-----|-----|-----|-----|-----|
| rs2894003 | 30052418 | +/- | -/- | -/- | -/- | -/- | -/- |
| rs3915798 | 30058271 | -/+ | -/- | -/- | -/- | -/- | -/- |
| rs5875226 | 30059808 | -/+ | -/- | -/- | -/- | -/- | -/- |
| rs9468675 | 30066556 | -/+ | -/- | -/- | -/- | -/- | -/- |
| rs1345274 | 31296875 | -/- | -/+ | -/- | -/- | -/- | -/- |
| rs3869115 | 31310909 | -/- | +/- | -/- | -/- | -/- | -/- |
| rs3868082 | 31313896 | -/- | +/- | -/- | -/- | -/- | -/- |
| rs3130425 | 31323067 | -/- | -/- | -/+ | -/- | -/- | -/- |
| rs3130542 | 31336843 | -/- | +/- | -/- | -/- | -/- | -/- |
| rs2844623 | 31337305 | -/- | +/- | -/- | -/- | -/- | -/- |
| rs2248902 | 31338876 | -/- | +/- | -/- | -/- | -/- | -/- |
| rs2524100 | 31340517 | -/- | +/+ | -/- | -/- | -/- | -/- |
| rs2853950 | 31340923 | -/- | +/+ | -/- | -/- | -/- | -/- |
| rs2001181 | 31341746 | -/- | +/+ | -/- | -/- | -/- | -/- |
| rs7383157 | 31344054 | -/- | +/- | -/- | -/- | -/- | -/- |
| rs2074491 | 31344644 | -/- | +/- | -/- | -/- | -/- | -/- |
| rs6457358 | 31344747 | -/- | +/- | -/- | -/- | -/- | -/- |
| rs2524094 | 31344789 | -/- | -/+ | -/- | -/- | -/- | -/- |
| rs2074489 | 31344876 | -/- | +/+ | -/- | -/- | -/- | -/- |
| rs2074488 | 31345179 | -/- | +/- | -/- | -/- | -/- | -/- |
| rs7759127 | 31345736 | -/- | +/- | -/- | -/- | -/- | -/- |
| rs6923313 | 31346118 | -/- | -/+ | -/- | -/- | -/- | -/- |
| rs3130696 | 31348627 | -/- | +/+ | -/- | -/- | -/- | -/- |
| rs2524074 | 31348764 | -/- | -/+ | -/- | -/- | -/- | -/- |
| rs2524069 | 31349532 | -/- | -/- | +/- | -/- | -/- | -/- |
| rs9348859 | 31354709 | -/- | +/- | -/- | -/- | -/- | -/- |
| rs3873379 | 31366897 | -/- | -/- | -/+ | -/- | -/- | -/- |
| rs2844586 | 31422213 | -/- | -/- | -/+ | -/- | -/- | -/- |
| rs2523619 | 31422333 | -/- | -/- | +/- | -/- | -/- | -/- |
| rs2523618 | 31422492 | -/- | -/- | +/- | -/- | -/- | -/- |
| rs2442719 | 31424730 | -/- | -/- | +/- | -/- | -/- | -/- |
| rs2596503 | 31425002 | -/- | -/- | +/+ | -/- | -/- | -/- |
| rs2596501 | 31425403 | -/- | -/- | -/+ | -/- | -/- | -/- |
| rs1058026 | 31425877 | -/- | -/- | +/+ | -/- | -/- | -/- |
| rs2769    | 31426074 | -/- | -/- | +/+ | -/- | -/- | -/- |
| rs3819300 | 31426495 | -/- | -/- | +/+ | -/- | -/- | -/- |
| rs3819299 | 31426559 | -/- | -/- | +/+ | -/- | -/- | -/- |
| rs3819294 | 31426679 | -/- | -/- | +/+ | -/- | -/- | -/- |
| rs2523608 | 31426751 | -/- | -/- | +/+ | -/- | -/- | -/- |
| rs3819285 | 31426934 | -/- | -/- | +/- | -/- | -/- | -/- |
| rs3819284 | 31426959 | -/- | -/- | +/+ | -/- | -/- | -/- |
| rs1051488 | 31427103 | -/- | -/- | +/- | -/- | -/- | -/- |
| rs2394985 | 31427747 | -/- | -/- | -/+ | -/- | -/- | -/- |
| rs3998357 | 31431253 | -/- | -/- | -/+ | -/- | -/- | -/- |
| rs2596438 | 31444042 | -/- | -/- | -/+ | -/- | -/- | -/- |
| rs2507987 | 31447204 | -/- | -/- | +/- | -/- | -/- | -/- |
| rs9266791 | 31463126 | -/- | -/- | +/- | -/- | -/- | -/- |
| rs7751505 | 31464441 | -/- | -/- | +/- | -/- | -/- | -/- |
| rs2256028 | 31483398 | -/- | -/- | +/- | -/- | -/- | -/- |
| rs9268516 | 32450662 | -/- | -/- | -/- | -/+ | -/- | -/- |
| rs2395175 | 32476248 | -/- | -/- | -/- | +/- | +/- | -/- |
| rs2395178 | 32476584 | -/- | -/- | -/- | -/+ | -/- | -/- |
| rs2239804 | 32482746 | -/- | -/- | -/- | +/- | -/- | -/- |
| rs3135388 | 32484240 | -/- | -/- | -/- | +/- | -/- | -/- |

**American Journal of Human Genetics, Volume 82**

|                              |          |     |     |     |     |     |     |
|------------------------------|----------|-----|-----|-----|-----|-----|-----|
| rs7452076                    | 32486270 | -/- | -/- | -/- | -/- | -/- | +/- |
| rs2395185                    | 32504360 | -/- | -/- | -/- | +/+ | -/- | -/- |
| rs2187823                    | 32510706 | -/- | -/- | -/- | -/+ | -/- | -/- |
| rs5026743                    | 32511162 | -/- | -/- | -/- | -/+ | -/- | -/- |
| rs6901541                    | 32513462 | -/- | -/- | -/- | -/- | +/+ | -/- |
| rs5020946                    | 32521277 | -/- | -/- | -/- | +/- | -/- | -/- |
| rs6932266                    | 32532340 | -/- | -/- | -/- | -/+ | -/- | -/- |
| rs2894266                    | 32536120 | -/- | -/- | -/- | +/+ | -/- | -/- |
| rs11754052                   | 32563120 | -/- | -/- | -/- | +/- | -/- | -/- |
| rs7753605                    | 32612642 | -/- | -/- | -/- | -/- | +/- | +/- |
| rs7451962                    | 32633927 | -/- | -/- | -/- | +/+ | +/+ | -/- |
| rs2097432                    | 32642277 | -/- | -/- | -/- | +/- | -/- | -/- |
| rs3129763                    | 32642431 | -/- | -/- | -/- | +/- | -/- | -/- |
| rs4639334                    | 32653366 | -/- | -/- | -/- | +/- | +/+ | -/- |
| rs5875382                    | 32653817 | -/- | -/- | -/- | -/+ | -/+ | +/+ |
| rs2040410                    | 32653850 | -/- | -/- | -/- | -/+ | -/- | -/- |
| rs2187668                    | 32657047 | -/- | -/- | -/- | -/- | +/+ | -/- |
| rs6927022                    | 32663617 | -/- | -/- | -/- | -/- | +/+ | -/- |
| rs6906021                    | 32672361 | -/- | -/- | -/- | -/- | -/- | +/+ |
| rs1064173                    | 32673520 | -/- | -/- | -/- | -/- | -/- | +/- |
| rs1063355                    | 32673754 | -/- | -/- | -/- | -/+ | -/+ | -/+ |
| rs2854276                    | 32674218 | -/- | -/- | -/- | -/- | -/- | +/- |
| rs3134996                    | 32683288 | -/- | -/- | -/- | -/- | -/- | +/+ |
| rs4947342                    | 32699490 | -/- | -/- | -/- | -/- | -/- | +/- |
| rs5875390                    | 32703793 | -/- | -/- | -/- | +/- | -/- | -/- |
| rs6457617                    | 32710272 | -/- | -/- | -/- | -/- | -/- | +/- |
| rs2647012                    | 32710879 | -/- | -/- | -/- | -/- | -/- | -/+ |
| rs2647045                    | 32714501 | -/- | -/- | -/- | -/- | -/- | -/+ |
| rs7764856                    | 32727018 | -/- | -/- | -/- | +/- | +/+ | -/- |
| rs3998159                    | 32728398 | -/- | -/- | -/- | -/- | -/+ | -/- |
| rs3997854                    | 32729294 | -/- | -/- | -/- | -/- | -/- | -/+ |
| Mean prediction accuracy (%) |          | 98  | 98  | 96  | 91  | 99  | 99  |

<sup>a</sup>Positive and negative signs indicate whether a SNP is used to predict alleles at a given HLA locus in CEU and YRI (CEU/YRI).
